# Supplementary material for: Photopheresis Abates the Anti-HLA Antibody Titer and Renal Failure Progression in Chronic Antibody-Mediated Rejection
Source: MDPI journal article supplement (doi:10.3390/biology10060547), 2021-06-18
Supplement: s1 [file s1]

Supplementary

# Photopheresis Abates the Anti-HLA Antibody Titer and Renal Failure Progression in Chronic Antibody-Mediated Rejection

Marilena Gregorini, Claudia Del Fante, Eleonora Francesca Pattonieri, Maria Antonietta Avanzini, Maria Antonietta Grignano, Irene Cassaniti, Fausto Baldanti, Giuditta Comolli, Angela Nocco, Miriam Ramondetta, Gianluca Viarengo, Vincenzo Sepe, Carmelo Libetta, Catherine Klersy, Cesare Perotti and Teresa Rampino

## ECP Schedule

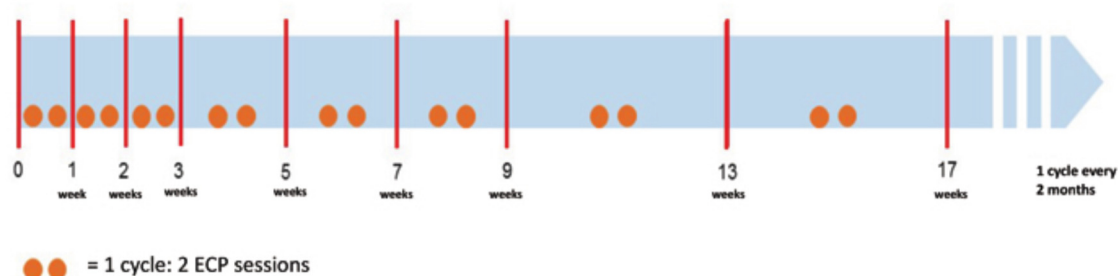

**Figure S1.** Schedule of ECP treatment. 1 cycle of ECP included two sessions performed in two consecutive days.

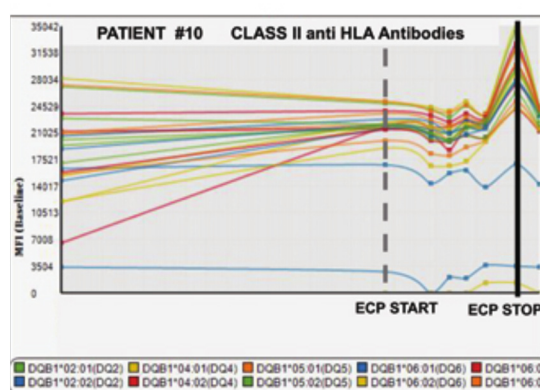

**Figure S2.** Anti HLA antibodies serum levels of not responder patient, whose HLA typing was unknown.
